# Supplementary material
Source: publisher figshare collection journal article supplement (https://acs.figshare.com/ndownloader/files/3847414)
Supplement: Supplementary file 1 [file 3847414]

# A QM/MM Free Energy Study of the Oxidation Mechanism of Dihydroorotate Dehydrogenase (Class 1A) from *Lactococcus lactis*

José Rogério A. Silva,<sup>†,‡</sup> Adrian E. Roitberg<sup>\*,‡,§</sup> and Cláudio Nahum Alves<sup>\*,†,‡</sup>

<sup>†</sup>Laboratório de Planejamento e Desenvolvimento de Fármacos, Instituto de Ciências Exatas e Naturais, Universidade Federal do Pará, Belém, PA 66075-110, Brazil

<sup>‡</sup>Department of Chemistry, University of Florida, Gainesville, Florida 32611-7200, United States

<sup>§</sup>Quantum Theory Project, University of Florida, Gainesville, Florida 32611-8435, United States

## Supporting Information

### 1. Correction of SCC-DFTB/MM by B3LYP/MM method

To correct the possible inaccuracies in the SCC-DFTB method and verify its reliability with a higher Hamiltonian, we carried out single-point B3LYP/MM calculations using representative snapshots from MC and TS states, which are the same used on the Interaction Energy Decomposition analysis. The corrected SCC-DFTB/MM results based on the B3LYP/MM calculations improve not only the QM level as well as the MM interactions and its polarization on the QM subsystem<sup>1</sup>. The SCC-DFTB correction was performed using a straightforward one-step free energy perturbation,

$$\Delta G_{\text{B3LYP-DFTB}} = -kT \ln \langle e^{-\beta(E_{\text{B3LYP/MM}} - E_{\text{DFTB/MM}})} \rangle_{\text{DFTB/MM}}$$

which was done at both MC and TS states. The difference between the perturbative correction at these two states gives the B3LYP/MM correction to the free energy of the half-reaction catalyzed by *L. lactis* DHOD. The B3LYP/6-31G\* was applied in order to perform the correction. The free energy barrier obtained by SCC-DFTB/MM method is estimated at 5.64 kcal/mol, whereas the free energy barrier calculated by B3LYP/MM is 5.06 kcal/mol. Therefore, the free energy difference between SCC-DFTB and B3LYP method is just 0.58 kcal/mol, showing the high reliability of the semiempirical method (SCC-DFTB) to the high Hamiltonian (B3LYP).

1. Riccardi, D.; Schaefer, P.; Cui, Q. Pk(a) Calculations In Solution And Proteins With QM/MM Free Energy Perturbation Simulations: A Quantitative Test Of QM/MM Protocols. *J. Phys. Chem. B* **2005**, *109*, 17715-17733.
